# Supplementary material for: An improved method for nematode infection assays in Drosophila larvae
Source: PubMed Central journal article supplement — Fly (Austin). 2012 Apr 1;6(2):75–9. doi: 10.4161/fly.19553 (PMC3397922; doi:10.4161/fly.19553), 2012-04-01
Supplement: fly-6-75-s02.pdf [file fly-6-75-s02.pdf]

**Supplemental Material to:**

Dobes P, Wang Z, Markus R, Theopold U, Hyrsi P. An improved method for nematode infection assays in *Drosophila* larvae. *Fly* 2012; 6(2); <http://dx.doi.org/10.4161/fly.6.2.19553>

<http://www.landesbioscience.com/journals/fly/article/19553/>

### **Legend to Supplemental Movie 1.**

The nematode infection of *Drosophila* larvae in plastic bag can be monitored in real time. The video clip shows the movement of two *Drosophila* larvae during the infection: at the stage shown here the infected larvae clearly distinguishable by GFP fluorescence were equally motile as the non-infected one.

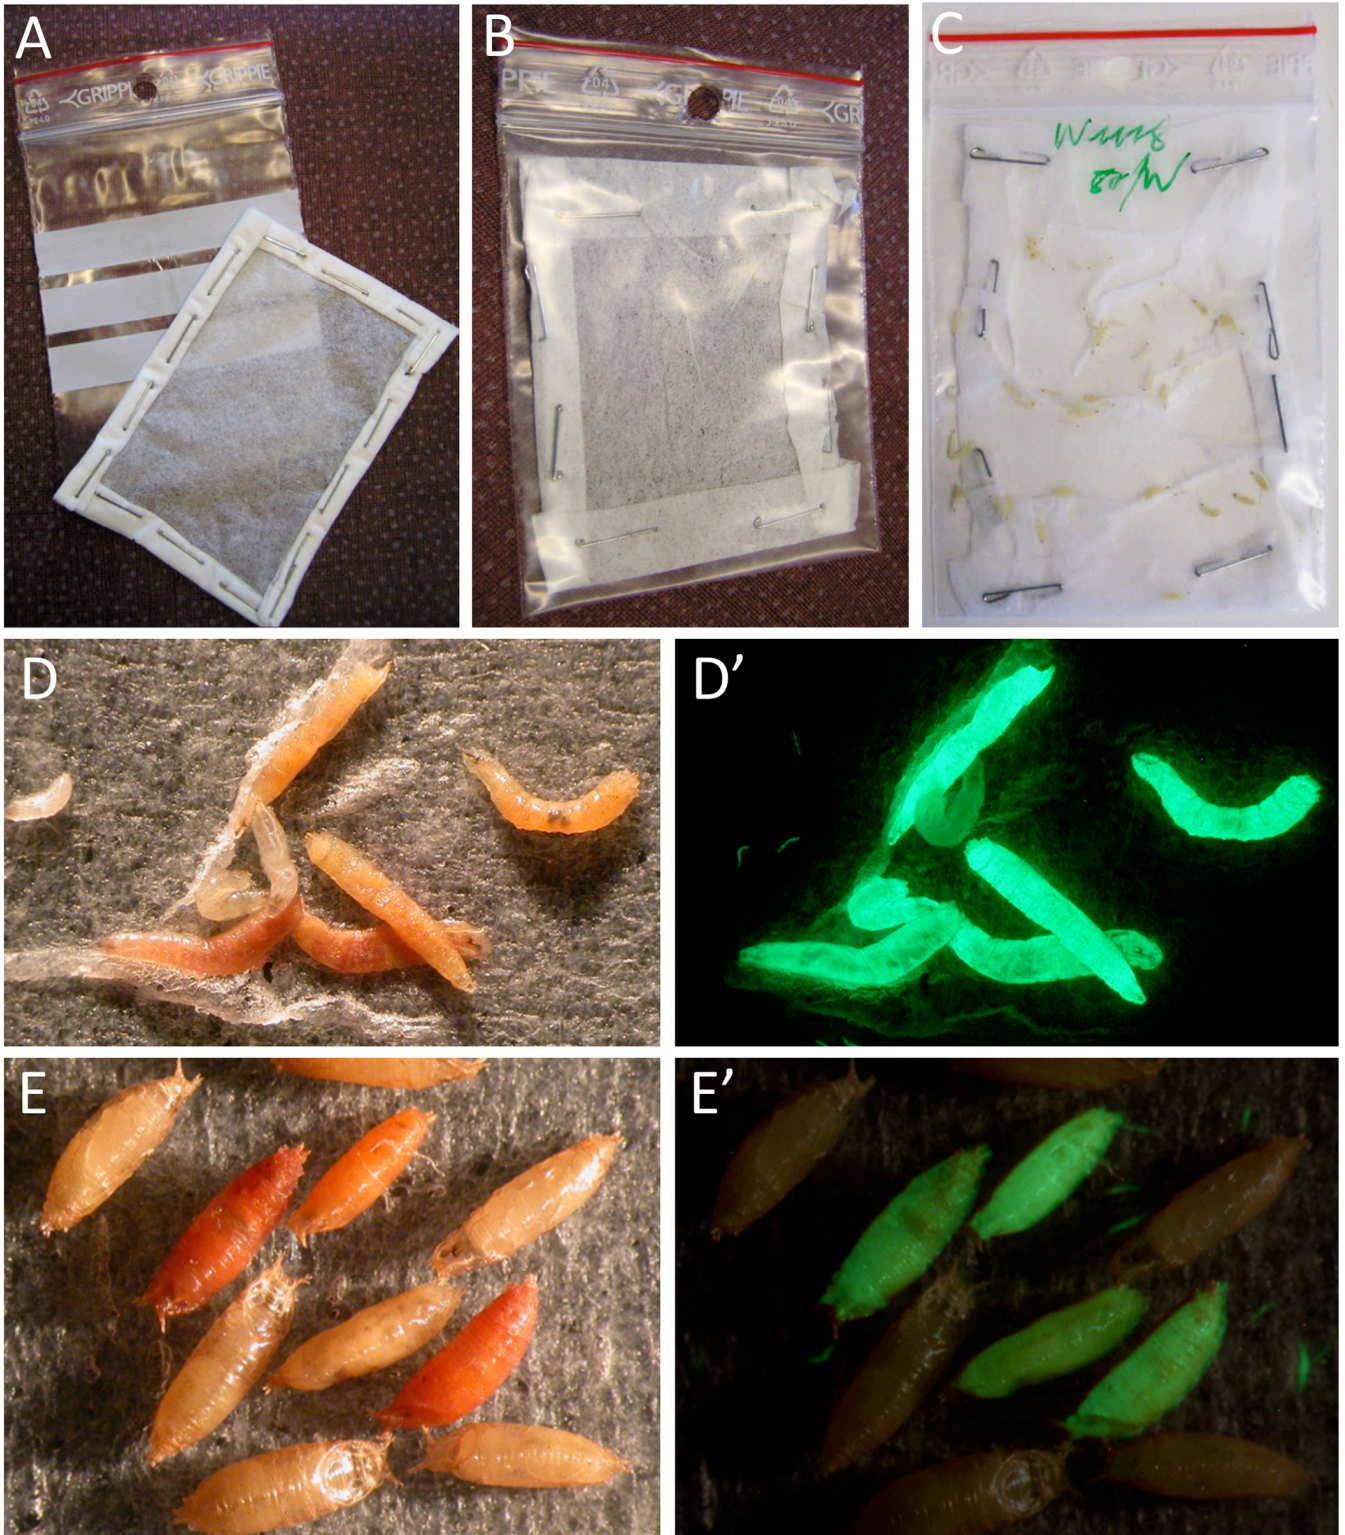

**Supplemental Figure 1.** The setup and validation of infection of *Drosophila* larvae with *H. bacteriophora* harbouring GFP-expressing *P. luminescens* within a transparent plastic bag. A-C shows the preparation for the infection with a re-sealable plastic bag before (A, B) and after infection (C). D and E show infected and non-infected hosts in normal light, while D' and E' show the same section as D and E under the fluorescent microscope.
